# Supplementary material for: Laboratory Identification of Leptotrichia Species Isolated From Bacteremia Patients at a Single Institution
Source: PubMed Central journal article supplement — Ann Lab Med. 2017 Feb 17;37(3):272–6. doi: 10.3343/alm.2017.37.3.272 (PMC5339101; doi:10.3343/alm.2017.37.3.272), 2017-02-17
Supplement: alm-37-272-s001.pdf [file alm-37-272-s001.pdf]

**Supplementary Table 1.** Clinical information of the five *Leptotrichia* bacteremia cases

| No. case | Age/<br>sex | Underlying<br>disease(s)                             | Sign/<br>symptom | CBC                        |                            |             |                            | Blood culture   |                 |                    |                    | Oral<br>mucosa<br>status                   | Coincident<br>CTX | BMT | Antimicrobial<br>therapy | Clinical<br>outcome                        |           |
|----------|-------------|------------------------------------------------------|------------------|----------------------------|----------------------------|-------------|----------------------------|-----------------|-----------------|--------------------|--------------------|--------------------------------------------|-------------------|-----|--------------------------|--------------------------------------------|-----------|
|          |             |                                                      |                  | WBC<br>( $\times 10^9/L$ ) | ANC<br>( $\times 10^9/L$ ) | Hb<br>(g/L) | Plt<br>( $\times 10^9/L$ ) | Central,<br>1st | Central,<br>2nd | Peripheral,<br>1st | Peripheral,<br>2nd |                                            |                   |     |                          |                                            |           |
| 1        | 7/M         | Burkitt's<br>lymphoma                                | Fever            | 7.20                       | 5.46                       | 103         | 352                        | Growth          | NG              | NG                 | NG                 | ND                                         | Ulceration        | Yes | No                       | Ampicillin/<br>sulbactam                   | Recovered |
| 2        | 37/M        | Diffuse large<br>B-cell<br>lymphoma                  | Fever            | 1.45                       | 0.78                       | 92          | 114                        | ND              | ND              | Growth             | NG                 | NG                                         | Normal            | Yes | No                       | Tazobactam/<br>piperacillin,<br>vancomycin | Recovered |
| 3        | 65/M        | Plasmablastic<br>lymphoma                            | Fever            | 0.39                       | 0.03                       | 77          | 1                          | ND              | ND              | Growth             | Growth             | Growth                                     | Mucositis         | No  | No                       | Cefepime                                   | Recovered |
| 4        | 34/F        | Double primary<br>cancer (colon &<br>gastric cancer) | Diarrhea         | 8.53                       | 6.74                       | 91          | 99                         | ND              | ND              | Growth             | Growth             | Growth<br>(with <i>Prateus</i><br>species) | Normal            | No  | No                       | Tazobactam/<br>piperacillin,<br>meropenem  | Recovered |
| 5        | 19/M        | Ewing sarcoma                                        | Fever            | 0.90                       | 0.00                       | 82          | 46                         | Growth          | NG              | NG                 | NG                 | ND                                         | Ulceration        | Yes | No                       | Cefepime                                   | Recovered |

Abbreviations: CBC, complete blood count; WBC, white blood cell; Plt, platelet; ANC, absolute neutrophil count; CTX, chemotherapy; BMT, bone marrow transplantation; NG, no growth; ND, not done.
